# Supplementary material for: Copy number variation in Han Chinese individuals with autism spectrum disorder
Source: PubMed Central journal article supplement (PMC4147384; doi:10.1186/1866-1955-6-34), 2014-08-23
Supplement: 1866-1955-6-34-S1.pdf [file 1866-1955-6-34-S1.pdf]

# Supplemental Methods

## Microarray Genotyping and Quality Control

DNA samples were submitted to The Centre for Applied Genomics in Toronto and genotyping was performed on the Affymetrix CytoScan HD platform. For arrays to be considered in the analysis, runs were required to meet or exceed the quality control thresholds specified by Affymetrix. These included a MAPD (Median Absolute Pairwise Difference) of  $\leq 0.25$ , a SNP QC (SNP Quality Control) of  $\geq 15.0$ , and a Waviness SD (Waviness Standard Deviation) of  $\leq 0.12$ . In total, 104 probands and 206 parents met or exceeded these minimum criteria. DNA samples from two of the mothers failed to meet the appropriate thresholds and were excluded from the rest of the study.

## Detection and Characterization of CNVs

Four different CNV detection algorithms were used to limit false-positive detections and generate high-confidence calls. These algorithms included the Affymetrix Chromosome Analysis Suite (ChAS) (Affymetrix Inc., USA), iPattern [1], Nexus [2], and Partek [3]. CNVs were required to span a minimum of 5 consecutive microarray probes and 20 kb. Only those CNVs that were defined as “stringent” were subsequently analyzed. A stringent CNV implies that it was detected by one or both of ChAS or iPattern, and if detected by only one of these algorithms, also by one of Nexus or Partek. Stringent calls on the X chromosome required calling by both ChAS and iPattern. Any sample whose total number of calls exceeded the mean by three or more times the standard deviation was removed from further analysis. A total of 100 probands and 200 parents (totaling 93 complete trios) passed these quality metrics. We confirmed the parentage for the 93 probands that were part of a trio using the PLINK tool set [4]. Rare CNVs could not overlap CNVs found at a frequency of greater than 0.1% in the control cohorts and were required to be at least 50% unique by length.

## Population-based control datasets

Four population-based datasets were used as controls in this study. The first included 873 DNA samples obtained as part of the Ontario Population Genomics Platform (OPGP) [5]. These samples were genotyped on the Affymetrix CytoScan HD array in the same fashion as the ASD cases and analyzed for CNVs using the same methods as those obtained from the ASD cohort. Over 95% of the samples in this cohort were obtained from individuals of European ancestry. These samples were used as our primary control dataset for use in the detection of rare copy number changes and to account for calling biases inherent to this array. The other three datasets consisted of individuals of Han Chinese ethnicity and comprised a secondary set by which we could detect rare CNVs specific to the Han Chinese population. The first included 170 Han Chinese individuals from the HapMap project [6]. The second included 147 Han Chinese controls genotyped by Lou et al [7]. Both of these datasets were run on the Affymetrix 6.0 array. The third dataset contained 918 Han Chinese samples collected as part of the Singapore Genome

Variation Project [8]. These samples were genotyped on the Illumina 1M Duo array. The use of these different cohorts enables the distinction of those CNVs that are truly rare in the Chinese population as opposed to rare only when compared to samples obtained from European individuals.

### **Experimental Validation of CNV calls**

CNVs of interest were validated using SYBR-Green based real-time quantitative PCR (qPCR) where possible. Primers were designed to amplify a region 90-140 bp in size using Primer3 software v. 0.4.0 (<http://bioinfo.ut.ee/primer3-0.4.0/>). Control primers were designed within the *FOXP2* locus which was used as a diploid locus control (Primer sequences available by request). For CNVs of interest, proband and paternal DNA were interrogated using this method. In addition, two HapMap samples (NA15510 (Female) and NA10851 (Male)), were used as “normal copy number” controls. All experiments were performed in triplicate. A TaqMan Copy Number Reference Assay was used to confirm additional copy number changes found in probands and their parents. Predesigned probes were selected within the target regions of interest and a reference assay amplified a two copy region. Both NA15510 (Female) and NA10851 (Male) were used as two-copy controls for autosomal CNVs.

### Supplementary Figure 1: Ancestry Determination in our ASD Cohort

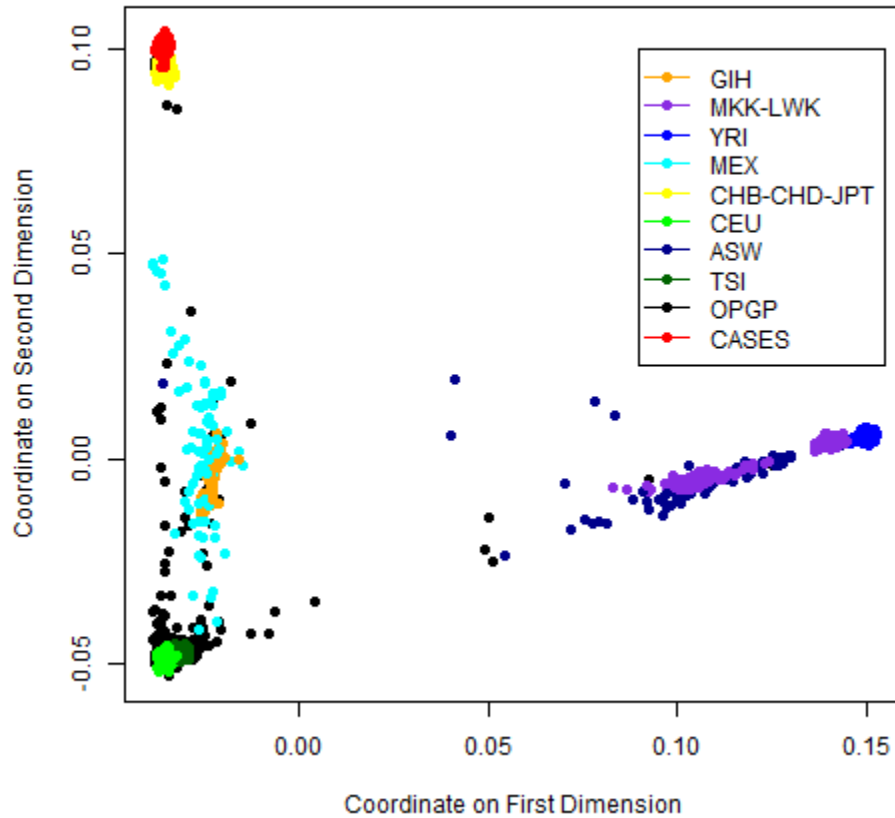

This plot was generated using 122,368 autosomal SNPs common to both the Affymetrix 6.0 and CytoScan HD platforms. All SNPs were required to have a genotyping rate exceeding 95% and a minor allele frequency greater than 5%. The plot shows that our sample cohort clusters with individuals of Asian ethnicity while our OPGP controls cluster primarily with individuals of European ancestry. This illustrates the importance of using additional sets of Han Chinese controls when identifying rare CNVs.

## Supplementary Figure 2: CNV Detection Workflow

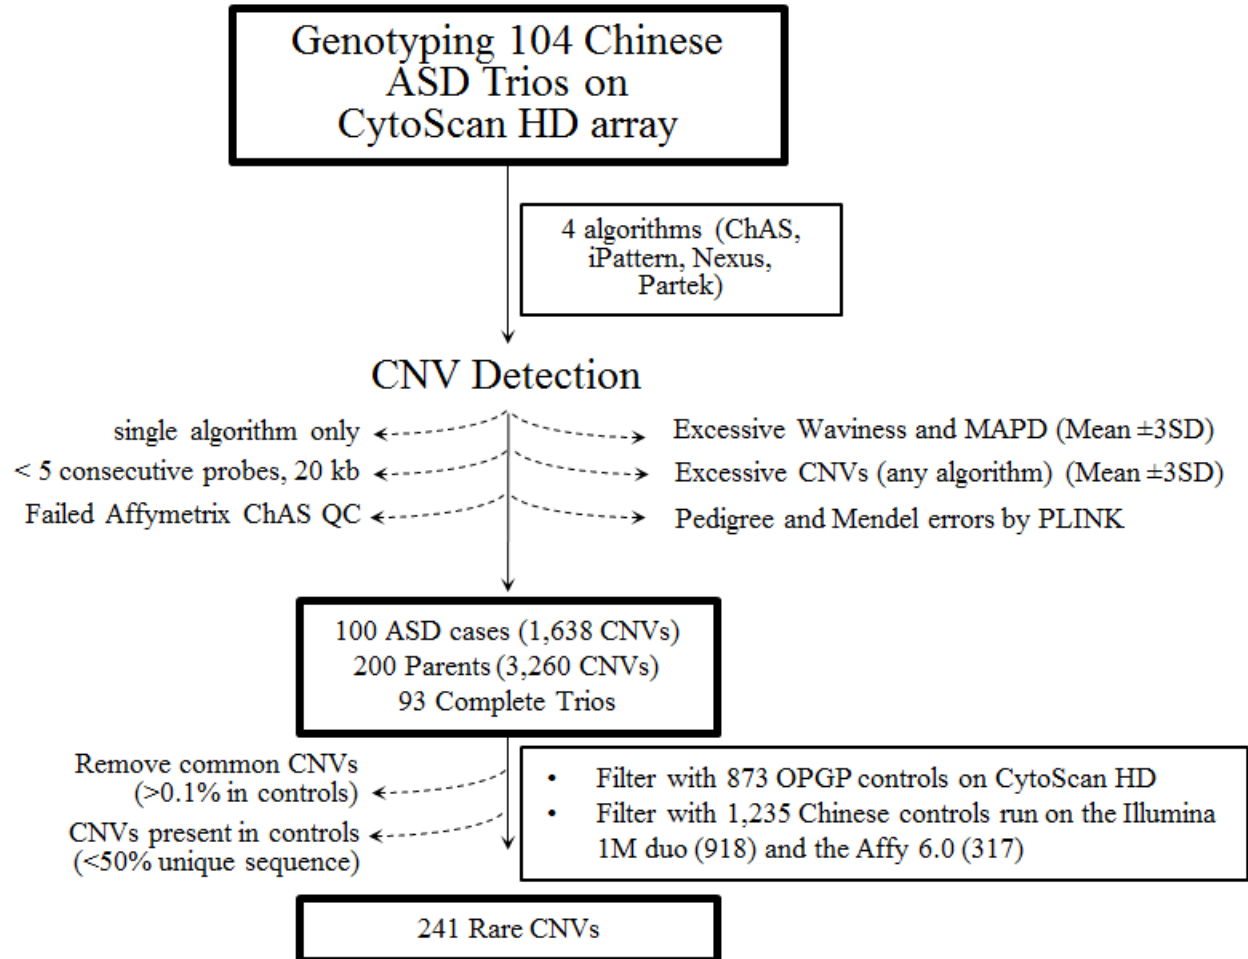

### Supplementary Figure 3: Identification of Brain-Critical Exons at 16p13.3

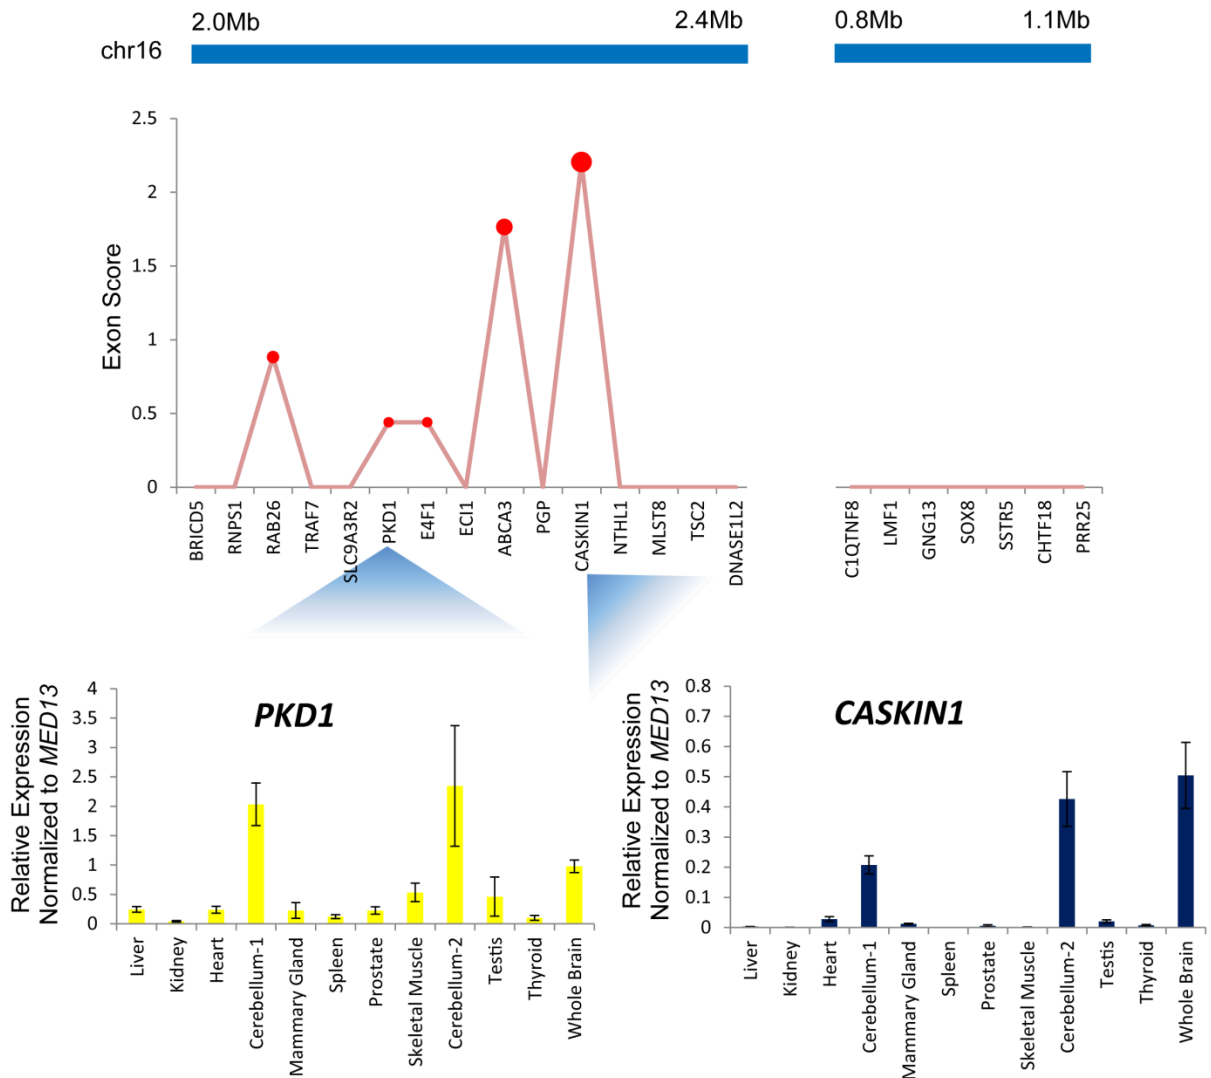

We computed the exon score as described previously [9] for each exon within the 16p13.3 duplications in our female proband to identify “brain-critical exons”. Of the five genes scoring above zero, *CASKIN1* and *PKD1* were selected for further investigation. We show that expression of these exons within these genes is higher in cerebellum and whole brain using a quantitative real-time PCR assay which looked at relative expression in these genes compared to *MED13* (*ACTB* was used instead in a confirmatory assay).

**Supplementary Table 1: List of Rare CNVs**

| Sample ID | chr | start       | end         | size    | Sex | CNV         | genes                                                                                       |
|-----------|-----|-------------|-------------|---------|-----|-------------|---------------------------------------------------------------------------------------------|
| 666-3     | 10  | 7,196,973   | 7,315,361   | 118,388 | M   | Deletion    | SFMBT2                                                                                      |
| 666-3     | 12  | 96,014,096  | 96,706,369  | 692,273 | M   | Duplication | CCDC38,HAL,ELK3,NTN4,CDK17,AMDHD1,LTA4H,SNRPF                                               |
| 666-3     | 3   | 55,284,137  | 55,403,172  | 119,035 | M   | Deletion    | -                                                                                           |
| 666-3     | 4   | 56,756,201  | 56,780,082  | 23,881  | M   | Duplication | EXOC1                                                                                       |
| 666-3     | Y   | 25,415,633  | 25,618,373  | 202,740 | M   | Deletion    | DAZ3,DAZ2,DAZ4                                                                              |
| 556-3     | 19  | 17,492,673  | 17,683,241  | 190,568 | M   | Duplication | TMEM221,PGLS,COLGALT1,FAM129C,BST2,NXNL1,MVB12A,SLC27A1                                     |
| 556-3     | 2   | 35,142,821  | 35,431,860  | 289,039 | M   | Deletion    | -                                                                                           |
| 556-3     | 20  | 23,836,569  | 23,924,631  | 88,062  | M   | Duplication | CST5                                                                                        |
| 556-3     | 4   | 38,798,854  | 38,829,628  | 30,774  | M   | Deletion    | TLR1,TLR6                                                                                   |
| 684-3     | 2   | 26,621,755  | 26,648,953  | 27,198  | M   | Deletion    | DRC1                                                                                        |
| 632-3     | 3   | 106,837,905 | 106,869,829 | 31,924  | F   | Deletion    | -                                                                                           |
| 632-3     | 7   | 1,169,619   | 1,192,647   | 23,028  | F   | Deletion    | C7orf50,ZFAND2A                                                                             |
| 527-3     | 4   | 124,063,146 | 125,045,116 | 981,970 | M   | Duplication | SPRY1,SPATA5                                                                                |
| 527-3     | 8   | 8,541,144   | 8,566,235   | 25,091  | M   | Deletion    | CLDN23                                                                                      |
| 527-3     | Y   | 3,951,652   | 4,159,244   | 207,592 | M   | Deletion    | -                                                                                           |
| 690-3     | 17  | 28,937,651  | 29,140,813  | 203,162 | M   | Duplication | CRLF3                                                                                       |
| 690-3     | 3   | 19,672,864  | 19,795,693  | 122,829 | M   | Deletion    | -                                                                                           |
| 690-3     | Y   | 19,797,643  | 19,962,926  | 165,283 | M   | Duplication | XKRY,XKRY2                                                                                  |
| 690-3     | Y   | 20,212,995  | 20,381,761  | 168,766 | M   | Duplication | XKRY,XKRY2                                                                                  |
| 505-3     | 13  | 43,587,160  | 43,608,103  | 20,943  | M   | Duplication | DNAJC15                                                                                     |
| 505-3     | 6   | 162,290,899 | 162,359,917 | 69,018  | M   | Duplication | PARK2                                                                                       |
| 505-3     | 7   | 31,681,765  | 31,921,749  | 239,984 | M   | Duplication | PDE1C,PPP1R17,CCDC129                                                                       |
| 505-3     | Y   | 6,532,597   | 6,577,903   | 45,306  | M   | Duplication | -                                                                                           |
| 505-3     | Y   | 21,231,039  | 21,333,110  | 102,071 | M   | Duplication | -                                                                                           |
| 554-3     | X   | 118,460,470 | 118,487,729 | 27,259  | M   | Deletion    | -                                                                                           |
| 670-3     | Y   | 22,243,114  | 22,489,344  | 246,230 | M   | Duplication | -                                                                                           |
| 681-3     | 14  | 92,422,164  | 92,443,907  | 21,743  | M   | Duplication | TRIP11                                                                                      |
| 681-3     | 2   | 112,530,696 | 112,579,331 | 48,635  | M   | Duplication | ANAPC1                                                                                      |
| 681-3     | 20  | 756,842     | 791,208     | 34,366  | M   | Deletion    | -                                                                                           |
| 681-3     | 3   | 120,614,922 | 120,645,266 | 30,344  | M   | Deletion    | STXBPSL                                                                                     |
| 625-3     | 17  | 20,801,835  | 20,893,760  | 91,925  | M   | Duplication | -                                                                                           |
| 659-3     | 2   | 21,438,794  | 21,462,096  | 23,302  | M   | Duplication | -                                                                                           |
| 659-3     | 7   | 79,927,625  | 79,972,710  | 45,085  | M   | Deletion    | -                                                                                           |
| 659-3     | 7   | 80,299,710  | 80,354,513  | 54,803  | M   | Deletion    | CD36                                                                                        |
| 678-3     | 16  | 68,284,483  | 68,376,819  | 92,336  | F   | Duplication | SLC7A6,PLA2G15,SLC7A6OS,PRMT7                                                               |
| 517-3     | 16  | 843,861     | 1,162,728   | 318,867 | F   | Duplication | C1QTNF8,LMF1,GNG13,SOX8,SSTR5,CHTF18,PRR25                                                  |
| 517-3     | 16  | 2,088,391   | 2,415,016   | 326,625 | F   | Duplication | BRICD5,RNPS1,RAB26,TRAF7,SLC9A3R2,PKD1,E4F1,ECI1,ABCA3,PGP,CASKIN1,NTHL1,MLST8,TSC2,DNAE1L2 |
| 517-3     | 18  | 29,638,649  | 29,677,400  | 38,751  | F   | Duplication | RNF138,RNF125                                                                               |

|       |    |             |             |         |   |             |                    |
|-------|----|-------------|-------------|---------|---|-------------|--------------------|
| 517-3 | 7  | 4,015,113   | 4,685,115   | 670,002 | F | Duplication | SDK1               |
| 517-3 | X  | 81,298,618  | 81,338,460  | 39,842  | F | Deletion    | -                  |
| 672-3 | 11 | 129,769,926 | 129,815,519 | 45,593  | M | Duplication | PRDM10             |
| 672-3 | 21 | 22,941,489  | 23,009,531  | 68,042  | M | Duplication | -                  |
| 672-3 | 4  | 71,227,646  | 71,250,769  | 23,123  | M | Deletion    | SMR3B,SMR3A        |
| 672-3 | Y  | 25,415,633  | 25,618,373  | 202,740 | M | Deletion    | DAZ3,DAZ2,DAZ4     |
| 508-3 | 5  | 24,949,269  | 24,990,295  | 41,026  | M | Duplication | -                  |
| 565-3 | 5  | 96,910,556  | 96,935,306  | 24,750  | M | Deletion    | -                  |
| 565-3 | 6  | 169,508,876 | 169,539,121 | 30,245  | M | Deletion    | -                  |
| 565-3 | X  | 90,817,396  | 90,889,532  | 72,136  | M | Deletion    | -                  |
| 565-3 | Y  | 16,160,929  | 16,189,527  | 28,598  | M | Duplication | VCY,VCY1B          |
| 530-3 | 20 | 31,988,157  | 32,009,801  | 21,644  | M | Duplication | SNTA1,CDK5RAP1     |
| 530-3 | 3  | 15,687,586  | 15,710,397  | 22,811  | M | Deletion    | ANKRD28            |
| 515-3 | 12 | 47,262,280  | 47,330,558  | 68,278  | M | Duplication | -                  |
| 515-3 | 15 | 41,585,043  | 41,617,637  | 32,594  | M | Duplication | OIP5               |
| 537-3 | 19 | 23,895,015  | 23,971,507  | 76,492  | M | Deletion    | ZNF681             |
| 537-3 | 7  | 27,497,389  | 27,537,776  | 40,387  | M | Deletion    | -                  |
| 685-3 | 15 | 42,418,261  | 42,447,236  | 28,975  | M | Deletion    | PLA2G4F            |
| 685-3 | 19 | 37,772,900  | 37,803,996  | 31,096  | M | Deletion    | -                  |
| 685-3 | 22 | 47,901,616  | 47,922,809  | 21,193  | M | Duplication | -                  |
| 685-3 | 6  | 68,342,496  | 68,410,749  | 68,253  | M | Duplication | -                  |
| 685-3 | X  | 8,289,192   | 8,338,653   | 49,461  | M | Deletion    | -                  |
| 646-3 | 5  | 120,872,438 | 120,895,959 | 23,521  | M | Deletion    | -                  |
| 646-3 | 6  | 169,508,876 | 169,539,121 | 30,245  | M | Deletion    | -                  |
| 560-3 | 6  | 80,110,296  | 80,354,297  | 244,001 | M | Duplication | LCA5,SH3BGRL2      |
| 560-3 | 6  | 80,884,791  | 80,997,902  | 113,111 | M | Duplication | BCKDHB             |
| 532-3 | 10 | 133,592,188 | 133,652,778 | 60,590  | M | Duplication | -                  |
| 532-3 | 17 | 17,444,603  | 17,476,218  | 31,615  | M | Duplication | PEMT               |
| 532-3 | 3  | 159,562,374 | 159,641,399 | 79,025  | M | Duplication | SCHIP1,IQCJ-SCHIP1 |
| 532-3 | 6  | 169,508,876 | 169,539,121 | 30,245  | M | Deletion    | -                  |
| 608-3 | 14 | 93,363,869  | 93,408,980  | 45,111  | M | Duplication | ITPK1,CHGA         |
| 608-3 | 3  | 2,352,000   | 2,434,492   | 82,492  | M | Deletion    | CNTN4              |
| 578-3 | 1  | 155,927,397 | 156,002,779 | 75,382  | F | Duplication | SSR2,ARHGEF2       |
| 578-3 | 2  | 68,125,250  | 68,176,751  | 51,501  | F | Deletion    | -                  |
| 578-3 | 7  | 7,953,108   | 7,999,416   | 46,308  | F | Deletion    | -                  |
| 578-3 | 7  | 146,329,136 | 146,362,505 | 33,369  | F | Deletion    | CNTNAP2            |
| 578-3 | 8  | 5,722,189   | 5,784,231   | 62,042  | F | Deletion    | -                  |
| 548-3 | 15 | 91,145,609  | 91,172,887  | 27,278  | M | Deletion    | CRTC3              |
| 550-3 | 14 | 106,291,501 | 106,319,497 | 27,996  | M | Duplication | -                  |
| 550-3 | 2  | 209,682,592 | 209,703,720 | 21,128  | M | Deletion    | -                  |
| 550-3 | 7  | 152,508,063 | 153,499,963 | 991,900 | M | Duplication | ACTR3B             |

|       |    |             |             |         |   |             |                                             |
|-------|----|-------------|-------------|---------|---|-------------|---------------------------------------------|
| 550-3 | X  | 143,651,892 | 143,748,641 | 96,749  | M | Duplication | -                                           |
| 550-3 | Y  | 22,311,731  | 22,489,344  | 177,613 | M | Duplication | -                                           |
| 540-3 | 16 | 77,191,477  | 77,227,551  | 36,074  | M | Duplication | MON1B                                       |
| 540-3 | 6  | 9,965,790   | 10,001,901  | 36,111  | M | Deletion    | -                                           |
| 540-3 | Y  | 27,653,382  | 27,809,359  | 155,977 | M | Deletion    | CDY1B,CDY1                                  |
| 664-3 | X  | 47,850,294  | 48,230,012  | 379,718 | M | Duplication | SPACA5,SSX5,SSX3,SSX1,ZNF630,ZNF182,SPACA5B |
| 664-3 | Y  | 26,513,714  | 26,587,395  | 73,681  | M | Deletion    | -                                           |
| 682-3 | 6  | 162,296,842 | 162,359,917 | 63,075  | M | Duplication | PARK2                                       |
| 682-3 | 7  | 43,361      | 705,271     | 661,910 | M | Duplication | PDGFA,FAM20C,PRKAR1B,LOC100288524           |
| 549-3 | 16 | 16,295,901  | 16,855,348  | 559,447 | M | Deletion    | ABCC6,NOMO3                                 |
| 677-3 | 12 | 99,996,714  | 100,080,217 | 83,503  | M | Deletion    | ANKS1B,FAM71C                               |
| 677-3 | 13 | 43,587,160  | 43,608,103  | 20,943  | M | Duplication | DNAJC15                                     |
| 677-3 | X  | 115,862,466 | 116,006,048 | 143,582 | M | Deletion    | -                                           |
| 511-3 | 2  | 186,884,124 | 187,008,504 | 124,380 | M | Deletion    | -                                           |
| 511-3 | 5  | 123,700,908 | 123,883,512 | 182,604 | M | Duplication | -                                           |
| 511-3 | 9  | 28,464,218  | 28,596,286  | 132,068 | M | Deletion    | LINGO2                                      |
| 511-3 | X  | 147,489,229 | 147,529,551 | 40,322  | M | Duplication | -                                           |
| 686-3 | 10 | 18,240,592  | 18,313,842  | 73,250  | M | Deletion    | SLC39A12                                    |
| 686-3 | 4  | 27,394,986  | 27,415,922  | 20,936  | M | Deletion    | -                                           |
| 686-3 | 9  | 119,547,311 | 119,567,789 | 20,478  | M | Deletion    | ASTN2                                       |
| 521-3 | 16 | 14,357,944  | 14,386,767  | 28,823  | M | Duplication | MKL2                                        |
| 647-3 | 1  | 79,572,639  | 79,967,028  | 394,389 | M | Deletion    | -                                           |
| 647-3 | 17 | 80,845,676  | 80,969,149  | 123,473 | M | Duplication | TBCD,B3GNTL1                                |
| 667-3 | 14 | 83,564,570  | 83,593,839  | 29,269  | M | Duplication | -                                           |
| 667-3 | 3  | 192,367,797 | 192,418,953 | 51,156  | M | Deletion    | FGF12                                       |
| 667-3 | 4  | 77,393,565  | 77,442,934  | 49,369  | M | Duplication | SHROOM3                                     |
| 567-3 | 11 | 25,664,801  | 25,738,322  | 73,521  | M | Deletion    | -                                           |
| 567-3 | 2  | 53,148,333  | 53,290,713  | 142,380 | M | Deletion    | -                                           |
| 567-3 | 4  | 122,480,241 | 122,577,042 | 96,801  | M | Duplication | -                                           |
| 567-3 | X  | 31,805,650  | 31,959,887  | 154,237 | M | Deletion    | DMD                                         |
| 493-3 | 10 | 78,292,989  | 78,320,204  | 27,215  | F | Deletion    | C10orf11                                    |
| 493-3 | X  | 153,822,886 | 153,843,460 | 20,574  | F | Deletion    | -                                           |
| 683-3 | 2  | 233,651,280 | 233,673,273 | 21,993  | F | Deletion    | GIGYF2                                      |
| 683-3 | 7  | 90,464,909  | 90,723,377  | 258,468 | F | Deletion    | CDK14                                       |
| 683-3 | 8  | 5,543,465   | 5,608,834   | 65,369  | F | Deletion    | -                                           |
| 534-3 | 15 | 32,206,861  | 32,231,263  | 24,402  | M | Duplication | -                                           |
| 534-3 | 4  | 71,227,646  | 71,250,769  | 23,123  | M | Deletion    | SMR3B,SMR3A                                 |
| 502-3 | 2  | 241,104,594 | 241,402,775 | 298,181 | M | Duplication | GPC1                                        |
| 502-3 | X  | 72,872,788  | 72,898,554  | 25,766  | M | Duplication | CHIC1                                       |
| 631-3 | 17 | 19,521,054  | 19,563,766  | 42,712  | F | Deletion    | ALDH3A2                                     |
| 631-3 | 2  | 179,752,984 | 179,780,855 | 27,871  | F | Deletion    | CCDC141                                     |



|       |    |             |             |         |   |             |                                                                                                               |
|-------|----|-------------|-------------|---------|---|-------------|---------------------------------------------------------------------------------------------------------------|
| 631-3 | 7  | 9,437,710   | 9,465,942   | 28,232  | F | Duplication | -                                                                                                             |
| 663-3 | 2  | 68,130,508  | 68,179,098  | 48,590  | M | Deletion    | -                                                                                                             |
| 663-3 | 6  | 169,494,891 | 169,539,121 | 44,230  | M | Deletion    | -                                                                                                             |
| 663-3 | 8  | 94,866,807  | 94,905,198  | 38,391  | M | Deletion    | -                                                                                                             |
| 663-3 | X  | 72,332,078  | 72,353,391  | 21,313  | M | Deletion    | -                                                                                                             |
| 577-3 | 4  | 71,227,646  | 71,250,769  | 23,123  | M | Deletion    | SMR3B,SMR3A                                                                                                   |
| 577-3 | 9  | 468,705     | 489,338     | 20,633  | M | Deletion    | KANK1                                                                                                         |
| 577-3 | Y  | 9,237,095   | 9,304,988   | 67,893  | M | Deletion    | TSPY4,TSPY3,TSPY1                                                                                             |
| 577-3 | Y  | 9,308,643   | 9,342,828   | 34,185  | M | Deletion    | TSPY4                                                                                                         |
| 668-3 | 11 | 124,133,810 | 124,231,918 | 98,108  | M | Deletion    | OR8G5,OR8G1,OR8D1,OR8D2                                                                                       |
| 668-3 | 18 | 7,079,996   | 7,580,481   | 500,485 | M | Duplication | LRRC30,LAMA1,PTPRM                                                                                            |
| 668-3 | 2  | 134,077,947 | 134,151,644 | 73,697  | M | Deletion    | NCKAP5                                                                                                        |
| 668-3 | 22 | 46,946,802  | 47,354,509  | 407,707 | M | Duplication | TBC1D22A,CERK,GRAMD4                                                                                          |
| 539-3 | 2  | 194,568,253 | 194,601,354 | 33,101  | M | Deletion    | -                                                                                                             |
| 539-3 | 3  | 83,191,785  | 83,232,605  | 40,820  | M | Duplication | -                                                                                                             |
| 607-3 | 7  | 85,624,564  | 85,673,895  | 49,331  | M | Deletion    | -                                                                                                             |
| 688-3 | 20 | 50,582,813  | 50,606,329  | 23,516  | M | Deletion    | -                                                                                                             |
| 574-3 | 19 | 58,791,213  | 58,813,839  | 22,626  | M | Deletion    | ZNF8                                                                                                          |
| 574-3 | 4  | 54,070,949  | 54,091,178  | 20,229  | M | Deletion    | SCFD2                                                                                                         |
| 574-3 | 8  | 5,057,783   | 5,323,185   | 265,402 | M | Deletion    | -                                                                                                             |
| 545-3 | 6  | 78,214,540  | 78,293,398  | 78,858  | M | Deletion    | -                                                                                                             |
| 545-3 | 7  | 125,147,776 | 125,168,006 | 20,230  | M | Duplication | -                                                                                                             |
| 503-3 | 16 | 28,819,029  | 29,051,191  | 232,162 | M | Deletion    | ATXN2L,ATP2A1,NFATC2IP,SPNS1,RABEP2,SH2B1,LAT,<br>TUFM,CD19                                                   |
| 676-3 | 1  | 246,261,903 | 246,324,760 | 62,857  | M | Deletion    | SMYD3                                                                                                         |
| 676-3 | 12 | 95,622,380  | 95,665,403  | 43,023  | M | Deletion    | VEZT                                                                                                          |
| 676-3 | 15 | 42,421,124  | 42,447,236  | 26,112  | M | Deletion    | PLA2G4F                                                                                                       |
| 542-3 | 1  | 65,924,510  | 66,031,445  | 106,935 | M | Duplication | LEPR                                                                                                          |
| 671-3 | 1  | 192,370,110 | 192,394,774 | 24,664  | M | Deletion    | -                                                                                                             |
| 671-3 | Y  | 25,415,633  | 25,618,373  | 202,740 | M | Deletion    | DAZ3,DAZ2,DAZ4                                                                                                |
| 691-3 | 1  | 208,513,516 | 208,556,206 | 42,690  | M | Duplication | -                                                                                                             |
| 691-3 | 12 | 86,005,217  | 86,139,905  | 134,688 | M | Duplication | -                                                                                                             |
| 691-3 | 9  | 115,714,003 | 115,746,828 | 32,825  | M | Deletion    | -                                                                                                             |
| 528-3 | 16 | 53,747,533  | 53,771,635  | 24,102  | M | Deletion    | FTO                                                                                                           |
| 528-3 | 3  | 22,039,451  | 22,103,146  | 63,695  | M | Deletion    | -                                                                                                             |
| 528-3 | 4  | 34,116,667  | 34,144,022  | 27,355  | M | Deletion    | -                                                                                                             |
| 528-3 | 6  | 127,607,555 | 127,654,281 | 46,726  | M | Deletion    | ECHDC1,RNF146                                                                                                 |
| 692-3 | 1  | 15,276,526  | 15,453,728  | 177,202 | M | Duplication | KAZN                                                                                                          |
| 692-3 | 17 | 2,455,643   | 3,449,869   | 994,226 | M | Duplication | CLUH,OR3A3,SPATA22,PAFAH1B1,OR1E1,OR1D5,OR1E2,<br>OR3A1,OR3A2,OR1D2,OR1A2,OR1A1,RAP1GAP2,<br>OR1G1,TRPV3,ASPA |
| 692-3 | 2  | 212,057,149 | 212,142,292 | 85,143  | M | Duplication | -                                                                                                             |
| 692-3 | 6  | 169,508,876 | 169,539,121 | 30,245  | M | Deletion    | -                                                                                                             |

|       |    |             |             |         |   |             |                                                                                      |
|-------|----|-------------|-------------|---------|---|-------------|--------------------------------------------------------------------------------------|
| 485-3 | 10 | 87,338,403  | 87,359,978  | 21,575  | M | Deletion    | GRID1                                                                                |
| 485-3 | 11 | 11,179,056  | 11,296,482  | 117,426 | M | Deletion    | GALNT18                                                                              |
| 626-3 | 21 | 22,485,241  | 22,526,967  | 41,726  | M | Deletion    | NCAM2                                                                                |
| 636-3 | 14 | 40,727,363  | 40,780,133  | 52,770  | M | Duplication | -                                                                                    |
| 538-3 | 1  | 101,104,505 | 101,132,410 | 27,905  | M | Deletion    | -                                                                                    |
| 538-3 | X  | 109,315,806 | 109,340,564 | 24,758  | M | Deletion    | TMEM164                                                                              |
| 562-3 | 10 | 135,377,075 | 135,400,250 | 23,175  | F | Deletion    | SYCE1                                                                                |
| 562-3 | 2  | 23,694,732  | 23,726,237  | 31,505  | F | Deletion    | KLHL29                                                                               |
| 562-3 | 3  | 128,340,747 | 128,367,730 | 26,983  | F | Duplication | RPN1                                                                                 |
| 562-3 | 3  | 136,633,504 | 136,664,731 | 31,227  | F | Duplication | NCK1                                                                                 |
| 562-3 | 6  | 100,423,832 | 100,467,829 | 43,997  | F | Duplication | MCHR2                                                                                |
| 562-3 | 9  | 33,876,490  | 33,951,019  | 74,529  | F | Duplication | UBAP2,UBE2R2                                                                         |
| 622-3 | 4  | 127,751,482 | 127,777,218 | 25,736  | M | Deletion    | -                                                                                    |
| 623-3 | 19 | 55,435,082  | 55,754,138  | 319,056 | M | Duplication | TNNT1,NLRP7,PPP6R1,NLRP2,PPP1R12C,SYT5,TNNI3, RDH13,EPS8L1,GP6,DNAAF3, TMEM86B,PTPRH |
| 623-3 | Y  | 27,410,703  | 27,607,527  | 196,824 | M | Duplication | -                                                                                    |
| 576-3 | 10 | 96,581,094  | 96,626,365  | 45,271  | M | Deletion    | CYP2C19                                                                              |
| 576-3 | 21 | 43,837,058  | 43,893,628  | 56,570  | M | Duplication | UBASH3A,RSPH1                                                                        |
| 576-3 | 9  | 9,473,063   | 9,572,759   | 99,696  | M | Deletion    | PTPRD                                                                                |
| 576-3 | 9  | 109,270,732 | 109,310,538 | 39,806  | M | Duplication | -                                                                                    |
| 662-3 | 11 | 85,774,746  | 85,845,045  | 70,299  | M | Duplication | PICALM                                                                               |
| 662-3 | 4  | 81,335,556  | 81,367,124  | 31,568  | M | Duplication | C4orf22                                                                              |
| 552-3 | 11 | 80,696,716  | 80,801,906  | 105,190 | M | Duplication | -                                                                                    |
| 552-3 | 5  | 56,498,189  | 56,574,179  | 75,990  | M | Duplication | GPBP1                                                                                |
| 552-3 | 5  | 178,679,462 | 178,790,851 | 111,389 | M | Deletion    | ADAMTS2                                                                              |
| 552-3 | 7  | 14,122,604  | 14,199,001  | 76,397  | M | Deletion    | DGKB                                                                                 |
| 552-3 | X  | 72,319,907  | 72,353,391  | 33,484  | M | Deletion    | NAP1L6                                                                               |
| 658-3 | 1  | 5,734,013   | 5,767,396   | 33,383  | M | Deletion    | -                                                                                    |
| 658-3 | 5  | 151,292,056 | 151,349,089 | 57,033  | M | Duplication | GLRA1                                                                                |
| 544-3 | 10 | 112,577,721 | 112,632,630 | 54,909  | M | Duplication | PDCD4,RBM20                                                                          |
| 544-3 | 2  | 214,391,134 | 214,424,922 | 33,788  | M | Duplication | SPAG16                                                                               |
| 520-3 | 7  | 19,980,047  | 20,098,212  | 118,165 | M | Deletion    | -                                                                                    |
| 520-3 | 7  | 111,218,682 | 111,319,190 | 100,508 | M | Duplication | -                                                                                    |
| 520-3 | 8  | 53,492,860  | 53,549,179  | 56,319  | M | Duplication | RB1CC1                                                                               |
| 519-3 | 2  | 241,544,852 | 241,572,469 | 27,617  | M | Deletion    | GPR35                                                                                |
| 519-3 | X  | 153,408,930 | 153,438,781 | 29,851  | M | Duplication | OPN1LW                                                                               |
| 535-3 | 2  | 35,758,580  | 35,795,100  | 36,520  | M | Deletion    | -                                                                                    |
| 535-3 | 3  | 164,088,939 | 164,113,222 | 24,283  | M | Deletion    | -                                                                                    |
| 514-3 | 11 | 11,116,025  | 11,187,898  | 71,873  | M | Duplication | -                                                                                    |
| 514-3 | 16 | 17,940,666  | 17,963,706  | 23,040  | M | Duplication | -                                                                                    |
| 514-3 | 5  | 96,910,556  | 96,935,306  | 24,750  | M | Deletion    | -                                                                                    |
| 514-3 | 5  | 153,412,185 | 153,531,977 | 119,792 | M | Duplication | FAM114A2,MFAP3                                                                       |

|       |    |             |             |         |   |             |                           |
|-------|----|-------------|-------------|---------|---|-------------|---------------------------|
| 523-3 | 2  | 75,820,691  | 75,919,242  | 98,551  | M | Duplication | MRPL19,GCFC2              |
| 523-3 | 3  | 285,783     | 318,812     | 33,029  | M | Deletion    | CHL1                      |
| 523-3 | 8  | 89,774,917  | 89,993,041  | 218,124 | M | Deletion    | -                         |
| 611-3 | 13 | 89,365,687  | 89,574,513  | 208,826 | M | Duplication | -                         |
| 611-3 | 7  | 37,913,050  | 38,246,663  | 333,613 | M | Duplication | NME8,STARD3NL,SFRP4,EPDR1 |
| 611-3 | X  | 32,548,066  | 32,603,018  | 54,952  | M | Deletion    | DMD                       |
| 611-3 | X  | 125,884,392 | 125,957,401 | 73,009  | M | Deletion    | CXorf64                   |
| 609-3 | 11 | 10,515,751  | 10,537,581  | 21,830  | M | Duplication | AMPD3,RNF141,MTRNR2L8     |
| 609-3 | 8  | 54,058,999  | 54,124,081  | 65,082  | M | Duplication | -                         |
| 609-3 | Y  | 26,504,496  | 26,592,401  | 87,905  | M | Deletion    | -                         |
| 687-3 | 5  | 96,910,556  | 96,935,306  | 24,750  | M | Deletion    | -                         |
| 489-3 | 14 | 94,555,466  | 94,587,345  | 31,879  | M | Duplication | IFI27,IFI27L1             |
| 489-3 | 17 | 18,692,538  | 18,726,389  | 33,851  | M | Deletion    | TVP23B                    |
| 489-3 | 4  | 64,569,828  | 65,118,025  | 548,197 | M | Duplication | -                         |
| 610-3 | X  | 82,973,565  | 82,997,765  | 24,200  | M | Duplication | -                         |
| 533-3 | 22 | 50,000,220  | 50,049,643  | 49,423  | M | Duplication | -                         |
| 693-3 | 2  | 74,892,914  | 74,990,885  | 97,971  | M | Duplication | SEMA4F                    |
| 693-3 | 5  | 164,041,749 | 164,131,456 | 89,707  | M | Duplication | -                         |
| 693-3 | X  | 134,384,557 | 134,802,358 | 417,801 | M | Duplication | DDX26B,ZNF75D,ZNF449      |
| 693-3 | Y  | 9,492,812   | 9,522,716   | 29,904  | M | Deletion    | -                         |
| 694-3 | 17 | 18,562,720  | 18,590,815  | 28,095  | M | Deletion    | ZNF286B                   |
| 694-3 | 4  | 34,658,484  | 34,685,352  | 26,868  | M | Deletion    | -                         |
| 694-3 | 4  | 48,825,457  | 49,093,773  | 268,316 | M | Duplication | OCIAD2,CWH43,OCIAD1       |
| 694-3 | 4  | 94,144,621  | 94,172,410  | 27,789  | M | Deletion    | GRID2                     |
| 694-3 | 5  | 19,409,085  | 19,430,309  | 21,224  | M | Deletion    | -                         |
| 694-3 | 6  | 169,508,876 | 169,539,121 | 30,245  | M | Deletion    | -                         |
| 694-3 | 9  | 28,491,679  | 28,630,598  | 138,919 | M | Deletion    | LINGO2                    |
| 656-3 | 1  | 25,583,489  | 25,756,453  | 172,964 | M | Duplication | RHCE,RHD,TMEM50A          |
| 656-3 | 14 | 87,355,480  | 87,446,496  | 91,016  | M | Deletion    | -                         |
| 656-3 | 7  | 4,490,966   | 4,525,949   | 34,983  | M | Deletion    | -                         |
| 628-3 | 20 | 8,913,944   | 8,976,141   | 62,197  | M | Duplication | -                         |
| 628-3 | 5  | 14,206,863  | 14,253,937  | 47,074  | M | Deletion    | TRIO                      |
| 628-3 | 9  | 115,714,003 | 115,746,828 | 32,825  | M | Deletion    | -                         |
| 689-3 | 14 | 62,849,708  | 62,960,957  | 111,249 | M | Duplication | -                         |
| 638-3 | 14 | 41,546,521  | 41,744,165  | 197,644 | F | Deletion    | -                         |
| 638-3 | 15 | 42,421,124  | 42,447,236  | 26,112  | F | Deletion    | PLA2G4F                   |
| 546-3 | 21 | 23,526,014  | 23,587,148  | 61,134  | F | Deletion    | -                         |
| 546-3 | 5  | 151,263,430 | 152,000,379 | 736,949 | F | Duplication | NMUR2,GLRA1               |
| 546-3 | 6  | 169,508,876 | 169,539,121 | 30,245  | F | Deletion    | -                         |
| 546-3 | 9  | 6,518,780   | 6,655,056   | 136,276 | F | Deletion    | GLDC                      |

**Supplementary Table 2: Summary statistics of stringent CNVs larger than 20 kb**

|                                          | <b>ASD Probands</b> | <b>Parents</b>     | <b>OPGP Controls</b> |
|------------------------------------------|---------------------|--------------------|----------------------|
| Samples                                  | 100                 | 200                | 873                  |
| Males/Females                            | 90/10               | 100/100            | 477/396              |
| #Stringent CNVs                          | 1,638               | 3,260              | 15,872               |
| Mean CNVs/sample $\pm$ SD <sup>a</sup>   | 16.38 $\pm$ 4.00    | 16.30 $\pm$ 3.84   | 18.18 $\pm$ 4.41     |
| Median                                   | 16                  | 16                 | 18                   |
| Mean CNV size (kb) $\pm$ SD <sup>b</sup> | 99.04 $\pm$ 213.32  | 89.41 $\pm$ 181.08 | 90.27 $\pm$ 166.64   |
| Median CNV size (kb)                     | 44.54               | 43.98              | 42.11                |
| %Gain/%Loss                              | 43.1%/56.9%         | 44.4%/55.6%        | 43.2%/56.8%          |
| #CNVs > 1Mb (%)                          | 14 (0.85%)          | 21 (0.64%)         | 116 (0.73%)          |
| #CNVs 100kb-1Mb (%)                      | 353 (21.55%)        | 658 (20.18%)       | 3190 (20.10%)        |
| #CNVs 20 kb-100kb (%)                    | 1,271 (77.60%)      | 2,581 (79.18%)     | 12,566 (79.17%)      |

<sup>a</sup> There is no significant difference between the mean number of CNV calls in ASD probands and their parents ( $p=0.8669$  using an unpaired two-tailed Fisher's exact test). We do notice a significant difference between the number of calls noted in ASD cases and OPGP controls run on the same array ( $p=0.0001$ ). We suspect that this is due to some batch effect and is not representative of some biological difference between cases and controls as the number of calls in controls is higher.

<sup>b</sup> There is no difference between the mean CNV size in ASD probands and either their parents or OPGP controls ( $p=0.6831$  and  $p=0.6292$ , respectively).

## Supplementary References

1. Pinto D, Darvishi K, Shi X, Rajan D, Rigler D, Fitzgerald T, Lionel AC, Thiruvahindrapuram B, Macdonald JR, Mills R, Prasad A, Noonan K, Gribble S, Prigmore E, Donahoe PK, Smith RS, Park JH, Hurles ME, Carter NP, Lee C, Scherer SW, Feuk L: **Comprehensive assessment of array-based platforms and calling algorithms for detection of copy number variants.** *Nature biotechnology* 2011, **29**:512-520.
2. Darvishi K: **Application of Nexus copy number software for CNV detection and analysis.** *Current protocols in human genetics / editorial board, Jonathan L Haines [et al]* 2010, **Chapter 4**:Unit 4 14 11-28.
3. Downey T: **Analysis of a multifactor microarray study using Partek genomics solution.** *Methods in enzymology* 2006, **411**:256-270.
4. Purcell S, Neale B, Todd-Brown K, Thomas L, Ferreira MA, Bender D, Maller J, Sklar P, de Bakker PI, Daly MJ, Sham PC: **PLINK: a tool set for whole-genome association and population-based linkage analyses.** *American journal of human genetics* 2007, **81**:559-575.
5. Costain G, Lionel AC, Merico D, Forsythe P, Russell K, Lowther C, Yuen T, Husted J, Stavropoulos DJ, Speevak M, Chow EW, Marshall CR, Scherer SW, Bassett AS: **Pathogenic rare copy number variants in community-based schizophrenia suggest a potential role for clinical microarrays.** *Human molecular genetics* 2013, **22**:4485-4501.
6. Altshuler DM, Gibbs RA, Peltonen L, Dermitzakis E, Schaffner SF, Yu F, Bonnen PE, de Bakker PI, Deloukas P, Gabriel SB, Gwilliam R, Hunt S, Inouye M, Jia X, Palotie A, Parkin M, Whittaker P, Chang K, Hawes A, Lewis LR, Ren Y, Wheeler D, Muzny DM, Barnes C, Darvishi K, Hurles M, Korn JM, Kristiansson K, Lee C, McCarroll SA, Nemesh J, Keinan A, Montgomery SB, Pollack S, Price AL, Soranzo N, Gonzaga-Jauregui C, Anttila V, Brodeur W, Daly MJ, Leslie S, McVean G, Moutsianas L, Nguyen H, Zhang Q, Ghorji MJ, McGinnis R, McLaren W, Takeuchi F, Grossman SR, Shlyakhter I, Hostetter EB, Sabeti PC, Adebamowo CA, Foster MW, Gordon DR, Licinio J, Manca MC, Marshall PA, Matsuda I, Ngare D, Wang VO, Reddy D, Rotimi CN, Royal CD, Sharp RR, Zeng C, Brooks LD, McEwen JE: **Integrating common and rare genetic variation in diverse human populations.** *Nature* 2010, **467**:52-58.
7. Lou H, Li S, Yang Y, Kang L, Zhang X, Jin W, Wu B, Jin L, Xu S: **A map of copy number variations in Chinese populations.** *PloS one* 2011, **6**:e27341.
8. Xu H, Poh WT, Sim X, Ong RT, Suo C, Tay WT, Khor CC, Seielstad M, Liu J, Aung T, Tai ES, Wong TY, Chia KS, Teo YY: **SgD-CNV, a database for common and rare copy number variants in three Asian populations.** *Human mutation* 2011, **32**:1341-1349.
9. Uddin M, Tammimies K, Pellicchia G, Alipanahi B, Hu P, Wang Z, Pinto D, Lau L, Nalpathamkalam T, Marshall CR, Blencowe BJ, Frey BJ, Merico D, Yuen RK, Scherer SW: **Brain-expressed exons under purifying selection are enriched for de novo mutations in autism spectrum disorder.** *Nature genetics* 2014.
